# Supplementary material for: Repression precedes independent evolutionary gains of a highly specific gene expression pattern
Source: PubMed Central journal article supplement — Cell Rep. Author manuscript; Available in PMC 2021 Nov 10. (PMC8578697; doi:10.1016/j.celrep.2021.109896), 2021-10-26
Supplement: NIHMS1751631-supplement-1.pdf [file NIHMS1751631-supplement-1.pdf]

**Cell Reports, Volume 37**

**Supplemental information**

**Repression precedes independent evolutionary  
gains of a highly specific gene expression pattern**

**Jian Pu, Zinan Wang, Haosu Cong, Jacqueline S.R. Chin, Jessa Justen, Cédric Finet, Joanne Y. Yew, and Henry Chung**

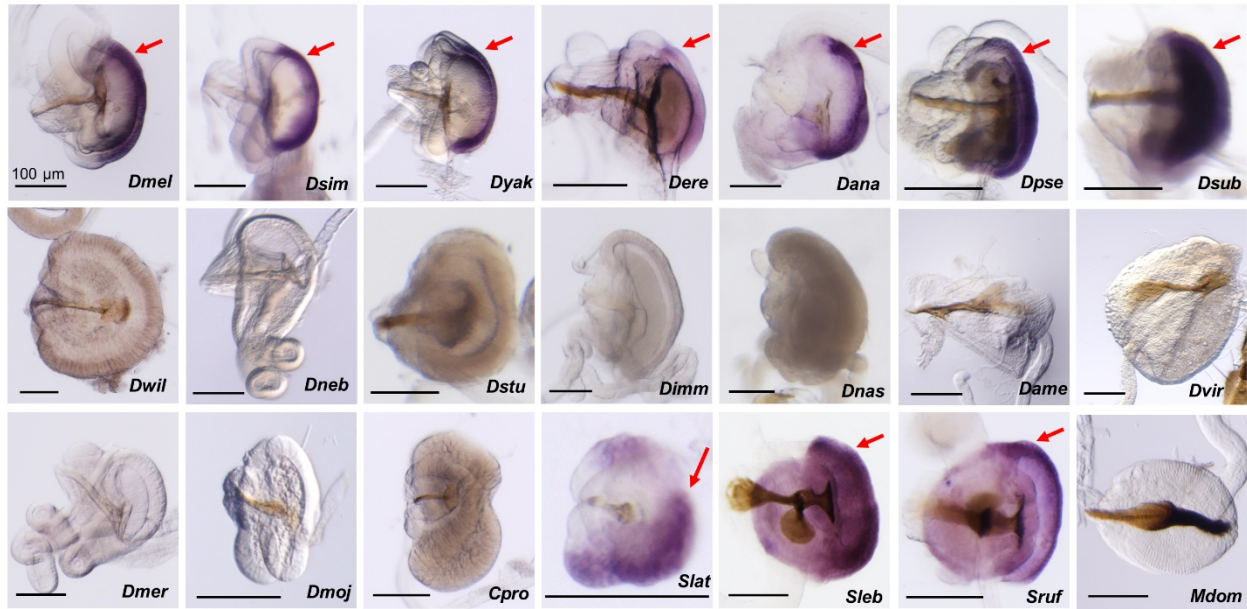

**Figure S1. *In situ* hybridization of *bond* in the ejaculatory bulb (EB) in 21 species.** *In situ* hybridization of *bond* to the EB of various *Drosophila* and other closely related species showed EB expression of *bond* in *D. melanogaster*, *D. simulans*, *D. erecta*, *D. yakuba*, *D. ananassae*, *D. pseudoobscura*, and *D. subobscura*, *Scaptodrosophila* species, *S. latifasciaeformis*, *S. lebanonensis*, and *S. rufifrons*, but not in other species tested. Arrows indicate *bond* expression in the EB determined by *in situ* hybridization. *Dmel* = *Drosophila melanogaster*, *Dsim* = *D. simulans*, *Dyak* = *D. yakuba*, *Dere* = *D. erecta*, *Dana* = *D. ananassae*, *Dpse* = *D. pseudoobscura*, *Dsub* = *D. subobscura*, *Dneb* = *D. nebulosa*, *Dstu* = *D. sturtevantii*, *Dimm* = *D. immigrans*, *Dnas* = *D. nasuta*, *Dame* = *D. americana*, *Dvir* = *D. virilis*, *Dmer* = *D. mercatorum*, *Dmoj* = *D. mojavensis*, *Cpro* = *Chymomyza procnemis*, *Slat* = *Scaptodrosophila latifasciaeformis*, *Sleb* = *S. lebanonensis*, *Sruf* = *S. rufifrons*, and *Mdom* = *Musca domestica*. The EBs of the *Scaptodrosophila*, *Chymomyza* and *Musca* species are morphologically different from the EBs of the *Drosophila* species. The EB of *M. domestica* is previously referred to as an ejaculatory sac. (Related to Figure 1B).

*D. melanogaster*

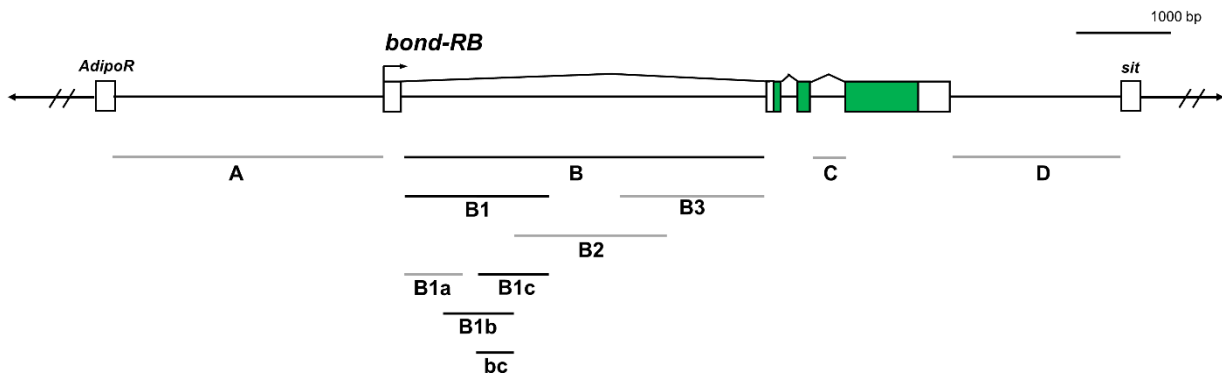

**Figure S2. The large intron of *bond* contains sequences that can drive GFP expression in the EB semicircular wall epithelium (*swe*) in *D. melanogaster*.** Overlapping fragments from the non-coding region around the *D. melanogaster* *bond* locus were screened for *cis*-regulatory sequences that were able to drive GFP reporter protein expression in the EB *swe*. Black lines indicate fragments able to drive GFP expression in the EB *swe*. Grey lines indicate fragments not able to drive GFP in the EB *swe*. (Related to Figure 2, 3A)



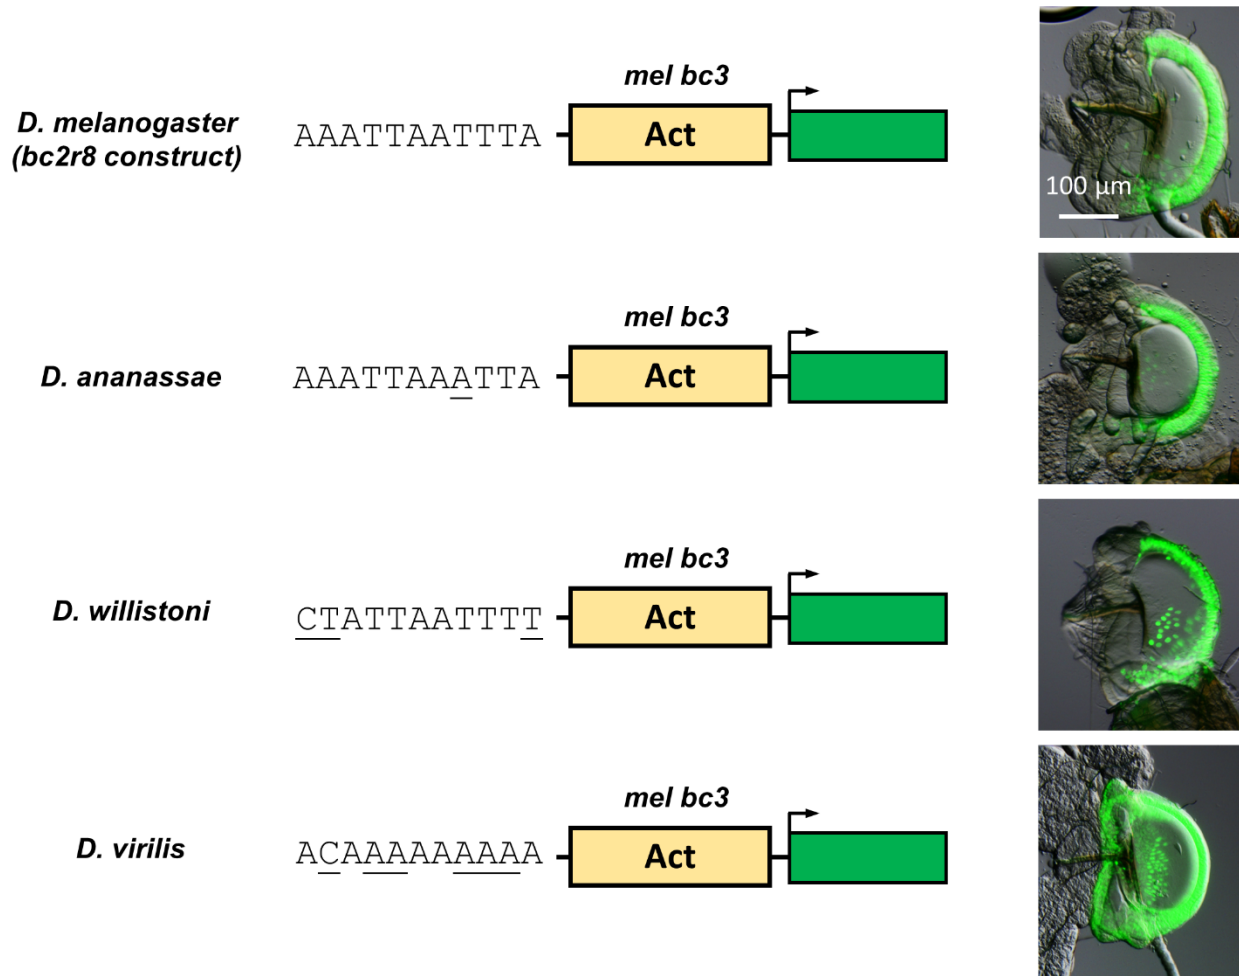

**Figure S4. Testing 11bp sequences from other *Drosophila* species for ability for spatial repression in the EB.**

The 11bp sequences from *D. ananassae* and *D. willistoni* at the same location as the *D. melanogaster* 11bp repressor sequences are able to repress expression in the EB *hb* and *hwe*. The 11bp sequences from *D. virilis* did not repress expression in these sites. (Related to Figure 4D)

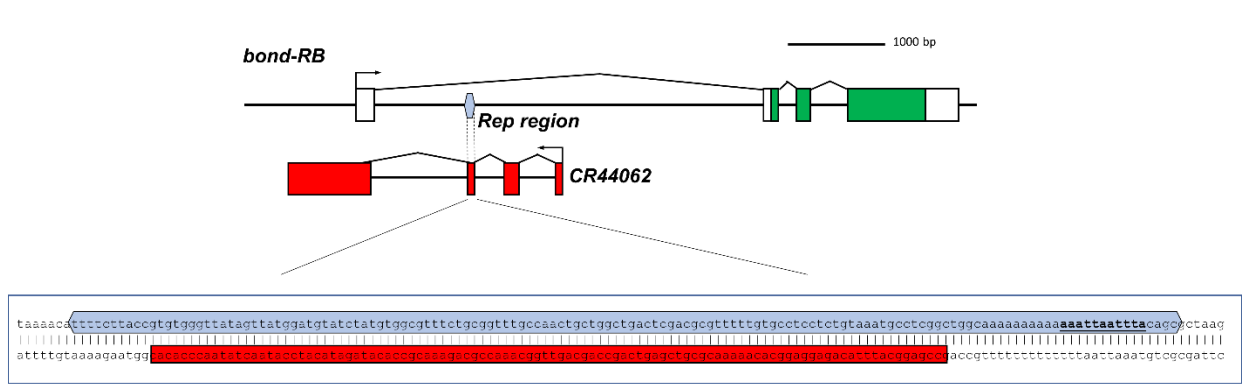

**Figure S5. Schematic showing positions of Rep region (blue) of EB swe enhancer and the antisense non-coding RNA *CR44062* relative to the *bond* locus. The Rep region overlaps with the exon of *CR44062*. (Related to Figure 4D)**
